# Supplementary material for: Academic Outcomes of School-Aged Children Born Preterm: A Systematic Review and Meta-analysis
Source: PubMed Central journal article supplement (PMC7125435; doi:10.1001/jamanetworkopen.2020.2027), 2020-04-03

## Supplementary Online Content

McBryde M, Fitzallen GC, Liley HG, Taylor HG, Bora S. Academic outcomes of school-aged children born preterm: A systematic review and meta-analysis. *JAMA Netw Open*. 2020;3(4):e202027. doi:10.1001/jamanetworkopen.2020.2027

**eTable 1.** List of Keywords Used in Database Searches

**eTable 2.** List of Assessment Measures from Included Studies

**eTable 3.** Jackknife Sensitivity Analysis for Academic Subskills Comparisons

**eFigure 1.** PRISMA Flowchart of Study Selection Process

**eFigure 2.** Inverse-Variance Random-Effects Forest Plot of Gestational Age and Reading Outcomes for Preterm and Term-Born Children

**eFigure 3.** Inverse-Variance Random-Effects Forest Plot of Gestational Age and Mathematics Outcomes for Preterm and Term-Born Children

**eFigure 4.** Inverse-Variance Random-Effects Forest Plot of Assessment Age and Reading Outcomes for Preterm and Term-Born Children

**eFigure 5.** Inverse-Variance Random-Effects Forest Plot of Assessment Age and Mathematics Outcomes for Preterm and Term-Born Children

**eFigure 6.** Inverse-Variance Random-Effects Forest Plot of Birth Era and Reading Outcomes for Preterm and Term-Born Children

**eFigure 7.** Inverse-Variance Random-Effects Forest Plot of Birth Era and Mathematics Outcomes for Preterm and Term-Born Children

This supplementary material has been provided by the authors to give readers additional information about their work.

**eTable 1.** List of Keywords Used in Database Searches

| <b>Population</b>         | <b>Exposure</b>              | <b>Outcome</b>                 |
|---------------------------|------------------------------|--------------------------------|
| child                     | prematu* <sup>*</sup>        | follow up                      |
| children                  | preterm birth                | neurodevelopment <sup>*</sup>  |
| adolescent                | “very preterm”               | intelligence                   |
| “pre-school”              | “extremely preterm”          | academic                       |
| “primary school”          | birth weight                 | “school performance”           |
| “elementary school”       | “low birth weight”           | delay <sup>*</sup>             |
| Elementary                | “very low birth weight”      | deficit <sup>*</sup>           |
| pre-school <sup>*</sup>   | “extremely low birth weight” | impairment                     |
| kindergarten <sup>*</sup> | “late preterm”               | development <sup>*</sup>       |
| “grade school”            | “early term”                 | reading                        |
| school-age <sup>*</sup>   |                              | math <sup>*</sup>              |
| “secondary school”        |                              | spelling                       |
|                           |                              | arithmetic                     |
|                           |                              | numeracy                       |
|                           |                              | literacy                       |
|                           |                              | learning dis <sup>*</sup>      |
|                           |                              | developmental dis <sup>*</sup> |
|                           |                              | education <sup>*</sup>         |
|                           |                              | decoding                       |
|                           |                              | comprehension                  |
|                           |                              | phonological                   |
|                           |                              | language                       |
|                           |                              | learning                       |
|                           |                              | achievement                    |

**eTable 2.** List of Assessment Measures from Included Studies

| Study                  | Assessment Tool (cluster or subtest)                                                                                                                                                |
|------------------------|-------------------------------------------------------------------------------------------------------------------------------------------------------------------------------------|
| Anderson et al, 2003   | Wide Range Achievement Test, 3 <sup>rd</sup> Edition (reading <sup>a</sup> ; arithmetic <sup>b</sup> )                                                                              |
| Andreias et al, 2010   | Woodcock-Johnson Tests of Achievement (letter-word identification <sup>a</sup> ; calculation <sup>c</sup> )                                                                         |
| Assel et al, 2003      | Woodcock-Johnson Tests of Achievement-R (calculation <sup>c</sup> )                                                                                                                 |
| Botting et al, 1998    | Wechsler Objective Reading Dimensions (reading <sup>a</sup> )                                                                                                                       |
| Bowen et al, 2002      | Woodcock Reading Mastery Tests-Revised (total reading <sup>d</sup> ; basic reading skills <sup>e</sup> ; reading comprehension <sup>f</sup> ) TEMA-2 (maths quotient <sup>b</sup> ) |
| Brumbaugh et al, 2016  | Wide Range Achievement Test, 4 <sup>th</sup> Edition (reading <sup>d</sup> ; arithmetic <sup>b</sup> )                                                                              |
| Chaudhari et al, 2004  | Woodcock Reading Mastery Tests-Revised (arithmetic <sup>b</sup> )                                                                                                                   |
| Cheong et al, 2017     | Wide Range Achievement Test, 3 <sup>rd</sup> Edition (reading <sup>a</sup> ; arithmetic <sup>b</sup> )                                                                              |
| Downie et al, 2007     | Woodcock Reading Mastery Tests-Revised (word identification <sup>a</sup> ; word attack <sup>g</sup> )                                                                               |
| Doyle et al, 2000      | Wide Range Achievement Test, 4 <sup>th</sup> Edition (word reading <sup>a</sup> ; mathematical computation <sup>b</sup> )                                                           |
| Frye et al, 2009       | Woodcock-Johnson Test of Achievement (word attack <sup>g</sup> )                                                                                                                    |
| Gross et al, 2001      | Wechsler Individual Achievement Test (reading <sup>d</sup> ; maths composite <sup>h</sup> )                                                                                         |
| Grunau et al., 2002    | Wide Range Achievement Test-Revised (word reading <sup>a</sup> ; arithmetic <sup>b</sup> )                                                                                          |
| Grunau et al, 2004     | Wide Range Achievement Test, 3 <sup>rd</sup> Edition (reading <sup>a</sup> ; arithmetic <sup>b</sup> )                                                                              |
| Hutchinson et al, 2013 | Wide Range Achievement Test, 3 <sup>rd</sup> Edition (reading <sup>a</sup> ; arithmetic <sup>b</sup> )                                                                              |

| Study                 | Assessment Tool (cluster or subtest)                                                                                                                                                                                                                                                   |
|-----------------------|----------------------------------------------------------------------------------------------------------------------------------------------------------------------------------------------------------------------------------------------------------------------------------------|
| Johnson et al, 2011   | Wechsler Individual Achievement Test II (reading composite <sup>d</sup> ; word reading <sup>a</sup> ; pseudoword decoding <sup>g</sup> ; reading comprehension <sup>f</sup> ; maths composite <sup>h</sup> ; numerical operations <sup>c</sup> ; mathematical reasoning <sup>i</sup> ) |
| Lee et al, 2011       | Woodcock-Johnson III (basic reading skills <sup>e</sup> ; passage comprehension <sup>f</sup> )                                                                                                                                                                                         |
| Litt et al, 2012      | Woodcock-Johnson III Tests of Achievement (letter-word identification <sup>a</sup> ; calculation <sup>c</sup> )                                                                                                                                                                        |
| Loe et al, 2012       | Woodcock-Johnson III Tests of Achievement (broad reading <sup>d</sup> )                                                                                                                                                                                                                |
| McGrath et al, 2002   | Wide Range Achievement Test, 3 <sup>rd</sup> Edition (reading <sup>a</sup> ; arithmetic <sup>b</sup> )                                                                                                                                                                                 |
| Northam et al, 2012   | Wechsler Objective Reading Dimensions (reading <sup>a</sup> )                                                                                                                                                                                                                          |
| Pritchard et al, 2009 | Woodcock-Johnson III Tests of Achievement (passage comprehension <sup>f</sup> )                                                                                                                                                                                                        |
| Rickards et al, 2001  | Wide Range Achievement Test, 3 <sup>rd</sup> Edition (reading <sup>a</sup> ; arithmetic <sup>b</sup> )                                                                                                                                                                                 |
| Rose et al, 2011      | Woodcock-Johnson III Tests of Achievement (letter-word identification <sup>a</sup> , math fluency <sup>j</sup> ; applied problems <sup>i</sup> )                                                                                                                                       |
| Sayeur et al, 2015    | Wechsler Individual Achievement Test-II (word reading <sup>a</sup> )                                                                                                                                                                                                                   |
| Short et al, 2003     | Woodcock-Johnson Tests of Achievement-Revised (letter-word identification <sup>a</sup> ; passage comprehension <sup>f</sup> ; calculation <sup>c</sup> ; applied problems <sup>i</sup> )                                                                                               |
| Simms et al, 2015     | Wechsler Individual Achievement Test-II (maths composite <sup>h</sup> )                                                                                                                                                                                                                |
| Tandon et al, 2000    | Wide Range Achievement Test-Revised (reading <sup>a</sup> ; arithmetic <sup>b</sup> )                                                                                                                                                                                                  |
| Taylor et al, 1995    | Woodcock-Johnson Tests of Achievement-Revised (word identification <sup>a</sup> ; calculation <sup>c</sup> ; applied problems <sup>i</sup> )                                                                                                                                           |
| Taylor et al, 2008    | Woodcock-Johnson Revised Tests of Cognitive Ability (word identification <sup>a</sup> ; passage comprehension <sup>f</sup> )                                                                                                                                                           |

| Study                | Assessment Tool (cluster or subtest)                                                                                                        |
|----------------------|---------------------------------------------------------------------------------------------------------------------------------------------|
| Taylor et al, 2011   | Woodcock-Johnson Tests of Achievement (letter-word identification <sup>a</sup> ; calculation <sup>c</sup> ; applied problems <sup>i</sup> ) |
| Taylor et al, 2016   | Wide Range Achievement Test, 4 <sup>th</sup> Edition (reading <sup>a</sup> ; mathematical computation <sup>b</sup> )                        |
| Woodward et al, 2017 | Woodcock-Johnson III Tests of Achievement (math fluency <sup>j</sup> )                                                                      |

Note. Clusters and subtests with similar content and thought to test similar academic constructs were compiled to form the following for the purpose of meta-analysis: <sup>a</sup>Word Identification; <sup>b</sup>Mathematical Knowledge; <sup>c</sup>Calculation; <sup>d</sup>Aggregate Measures of Reading; <sup>e</sup>Decoding; <sup>f</sup>Reading Comprehension; <sup>g</sup>Phonological Decoding; <sup>h</sup>Aggregate Measures of Mathematics; <sup>i</sup>Applied Problems; <sup>j</sup>Mathematical Fluency.

**eTable 3.** Jackknife Sensitivity Analysis for Academic Subskills Comparisons

|                               | <b>Study removed</b>   | <b><i>f</i></b> | <b>Subtotal mean difference</b> | <b>95% CI</b>    | <b>p</b> |
|-------------------------------|------------------------|-----------------|---------------------------------|------------------|----------|
| Aggregate measures of reading | None                   | 92%             | -7.98                           | -13.05 to -2.91  | .002     |
|                               | Loe et al, 2012        | 94%             | -8.37                           | -14.35 to -2.39  | .006     |
|                               | Botting et al, 1998    | 93%             | -8.51                           | -15.26 to -1.76  | .01      |
|                               | Bowen et al, 2002      | 93%             | -7.11                           | -12.72 to -1.50  | .01      |
|                               | Brumbaugh et al, 2016  | 93%             | -9.06                           | -14.70 to -3.41  | .002     |
|                               | Gross et al, 2001      | 92%             | -8.99                           | -15.04 to -2.94  | .004     |
|                               | Johnson et al, 2011    | 63%             | -5.52                           | -8.22 to -2.81   | <.001    |
| Word identification           | None                   | 69%             | -7.44                           | -9.08 to -5.80   | <.001    |
|                               | Taylor et al, 2016     | 70%             | -7.33                           | -9.04 to -5.63   | <.001    |
|                               | Short et al, 2003      | 70%             | -7.56                           | -9.24 to -5.87   | <.001    |
|                               | Sayeur et al, 2015     | 70%             | -7.50                           | -9.15 to -5.85   | <.001    |
|                               | Northam et al, 2012    | 70%             | -7.38                           | -9.07 to -5.68   | <.001    |
|                               | McGrath et al, 2002    | 70%             | -7.46                           | -9.15 to -5.77   | <.001    |
|                               | Litt et al, 2012       | 70%             | -7.46                           | -9.18 to -5.74   | <.001    |
|                               | Hutchinson et al, 2013 | 70%             | -7.43                           | -9.18 to -5.68   | <.001    |
|                               | Grunau et al, 2004     | 70%             | -7.45                           | -9.17 to -5.74   | <.001    |
|                               | Doyle et al, 2000      | 70%             | -7.51                           | -9.26 to -5.77   | <.001    |
|                               | Downie et al, 2007     | 70%             | -7.37                           | -9.08 to -5.67   | <.001    |
|                               | Andreias et al, 2010   | 70%             | -7.52                           | -9.25 to -5.78   | <.001    |
|                               | Anderson et al, 2003   | 70%             | -7.48                           | -9.24 to -5.72   | <.001    |
|                               | Tandon et al, 2000     | 69%             | -7.07                           | -8.73 to -5.41   | <.001    |
|                               | Rose et al, 2011       | 69%             | -7.66                           | -9.32 to -5.99   | <.001    |
|                               | Rickards et al, 2001   | 69%             | -7.61                           | -9.29 to -5.94   | <.001    |
|                               | Grunau et al, 2002     | 69%             | -7.26                           | -8.92 to -5.59   | <.001    |
|                               | Taylor et al, 2008     | 68%             | -7.69                           | -9.33 to -6.05   | <.001    |
|                               | Taylor et al, 1995     | 68%             | -7.65                           | -9.32 to -5.99   | <.001    |
|                               | Taylor et al, 2011     | 67%             | -7.71                           | -9.34 to -6.08   | <.001    |
| Johnson et al, 2011           | 63%                    | -7.09           | -8.66 to -5.53                  | <.001            |          |
| Cheong et al, 2017            | 60%                    | -6.92           | -8.48 to -5.36                  | <.001            |          |
|                               | None                   | 99%             | -5.37                           | -27.41 to -16.67 | .63      |

|                                   | <b>Study removed</b>   | <b><i>f</i></b> | <b>Subtotal mean difference</b> | <b>95% CI</b>   | <b>p</b> |
|-----------------------------------|------------------------|-----------------|---------------------------------|-----------------|----------|
| Pseudoword decoding               | Downie et al, 2007     | 99%             | -4.86                           | -34.73 to 25.01 | .75      |
|                                   | Frye et al, 2009       | 98%             | -19.02                          | -42.73 to 4.70  | .12      |
|                                   | Johnson et al, 2011    | 90%             | 3.27                            | -6.91 to 13.45  | .53      |
| Reading Comprehension             | None                   | 81%             | -7.96                           | -12.15 to -3.76 | <.001    |
|                                   | Bowen et al, 2002      | 84%             | -7.48                           | -12.43 to -2.52 | .003     |
|                                   | Lee et al, 2011        | 84%             | -7.66                           | -12.66 to -2.66 | .003     |
|                                   | Short et al, 2003      | 83%             | -8.44                           | -13.62 to -3.63 | <.001    |
|                                   | Pritchard et al, 2009  | 80%             | -8.76                           | -13.36, -4.16   | <.001    |
|                                   | Taylor et al, 2008     | 79%             | -8.91                           | -13.34 to -4.49 | <.001    |
|                                   | Johnson et al, 2011    | 37%             | -6.23                           | -9.01 to -3.45  | <.001    |
| Aggregate measures of mathematics | None                   | 97%             | -12.90                          | -23.38 to -2.43 | .02      |
|                                   | Simms et al, 2015      | 98%             | -13.11                          | -26.33 to 0.12  | .05      |
|                                   | Botting et al, 1998    | 97%             | -14.87                          | -29.70 to -0.04 | .05      |
|                                   | Gross et al, 2001      | 97%             | -15.57                          | -29.15 to -2.00 | .02      |
|                                   | Johnson et al, 2011    | 56%             | -7.43                           | -10.81 to -4.05 | <.001    |
| Mathematical knowledge            | None                   | 62%             | -9.88                           | -11.68 to -8.08 | <.001    |
|                                   | Tandon et al, 2000     | 65%             | -9.52                           | -11.41 to -7.63 | <.001    |
|                                   | Anderson et al, 2003   | 64%             | -10.01                          | -12.02 to -7.99 | <.001    |
|                                   | Bowen et al, 2002      | 62%             | -9.61                           | -11.46 to -7.77 | <.001    |
|                                   | Cheong et al, 2017     | 54%             | -9.38                           | -11.17 to -7.59 | <.001    |
|                                   | Doyle et al, 2000      | 65%             | -9.94                           | -11.93 to -7.95 | <.001    |
|                                   | Grunau et al, 2002     | 65%             | -9.91                           | -11.83 to -7.99 | <.001    |
|                                   | Grunau et al, 2004     | 62%             | -9.63                           | -11.45 to -7.81 | <.001    |
|                                   | Hutchinson et al, 2013 | 65%             | -9.96                           | -11.93 to -7.99 | <.001    |
|                                   | McGrath et al, 2002    | 65%             | -9.87                           | -11.77 to -7.98 | <.001    |
|                                   | Rickards et al, 2001   | 64%             | -10.08                          | -11.96 to -8.2  | <.001    |
|                                   | Taylor et al, 2016     | 65%             | -9.81                           | -11.74 to -7.89 | <.001    |
|                                   | Chaudhari et al, 2004  | 59%             | -10.24                          | -12.04 to -8.44 | <.001    |
|                                   | Brumbaugh et al, 2016  | 49%             | -10.36                          | -11.93 to -8.78 | <.001    |
| Calculation                       | None                   | 92%             | -10.57                          | -15.62 to -5.52 | <.001    |
|                                   | Andreias et al, 2010   | 93%             | -10.85                          | -17.1 to -4.59  | <.001    |

|                  | <b>Study removed</b> | <b><i>I</i><sup>2</sup></b> | <b>Subtotal mean difference</b> | <b>95% CI</b>   | <b>p</b> |
|------------------|----------------------|-----------------------------|---------------------------------|-----------------|----------|
|                  | Assel et al, 2003    | 93%                         | -11.10                          | -16.84 to -5.36 | <.001    |
|                  | Litt et al, 2012     | 93%                         | -10.35                          | -16.2 to -4.51  | <.001    |
|                  | Short et al, 2003    | 93%                         | -10.29                          | -15.96 to -4.62 | <.001    |
|                  | Taylor et al, 1995   | 93%                         | -10.99                          | -16.85 to -5.13 | <.001    |
|                  | Taylor et al, 2011   | 89%                         | -11.89                          | -16.87 to -6.92 | <.001    |
|                  | Johnson et al, 2011  | 68%                         | -8.34                           | -11.22 to -5.45 | <.001    |
| Applied problems | None                 | 91%                         | -11.41                          | -17.57 to -5.26 | <.001    |
|                  | Taylor et al, 1995   | 93%                         | -11.90                          | -19.44 to -4.36 | .002     |
|                  | Taylor et al, 2011   | 93%                         | -11.48                          | -19.33 to -3.63 | .004     |
|                  | Short et al, 2003    | 92%                         | -12.13                          | -19.44 to -4.81 | .001     |
|                  | Rose et al, 2011     | 91%                         | -12.71                          | -19.49 to -5.92 | <.001    |
|                  | Johnson et al, 2011  | 0%                          | -8.82                           | -11.07 to -6.57 | <.001    |

Note. No sensitivity analyses are provided for the subgroups of Decoding and Mathematical Fluency as these comparisons included data from two studies only.



**eFigure 1. PRISMA Flowchart of Study Selection Process**

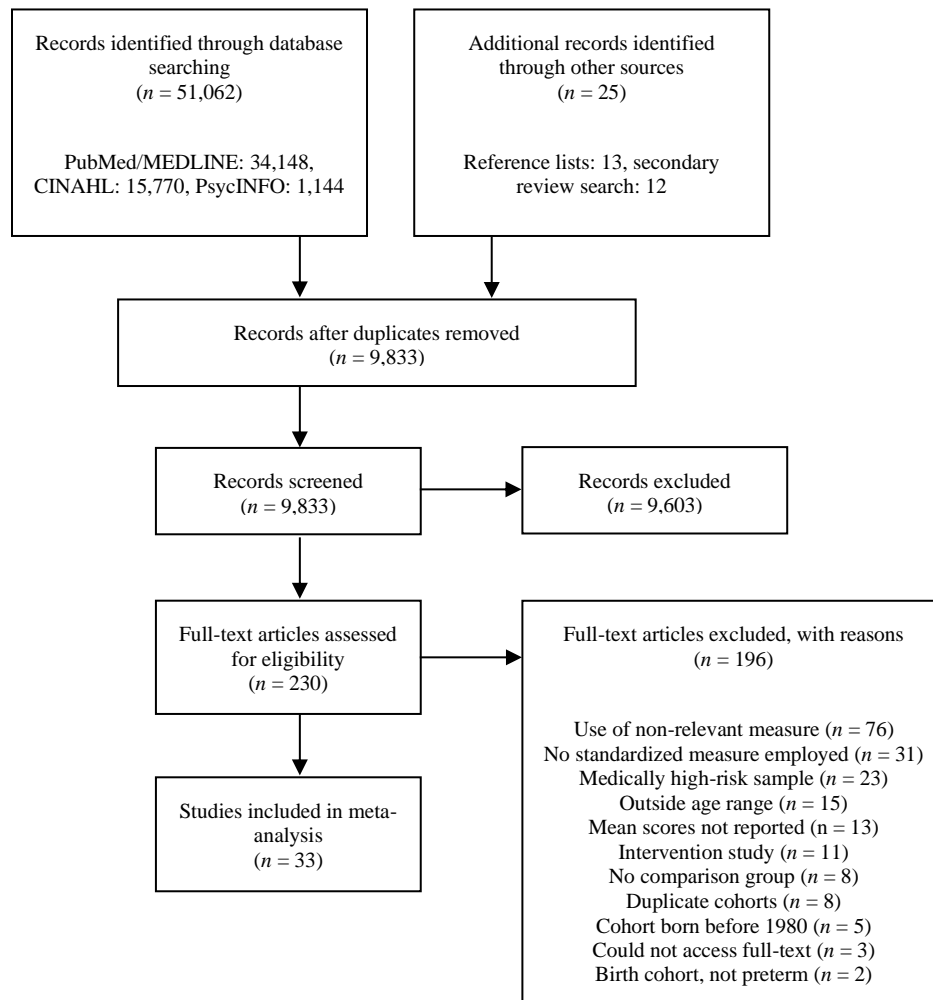

**eFigure 2.** Inverse-Variance Random-Effects Forest Plot of Gestational Age and Reading Outcomes for Preterm and Term-Born Children

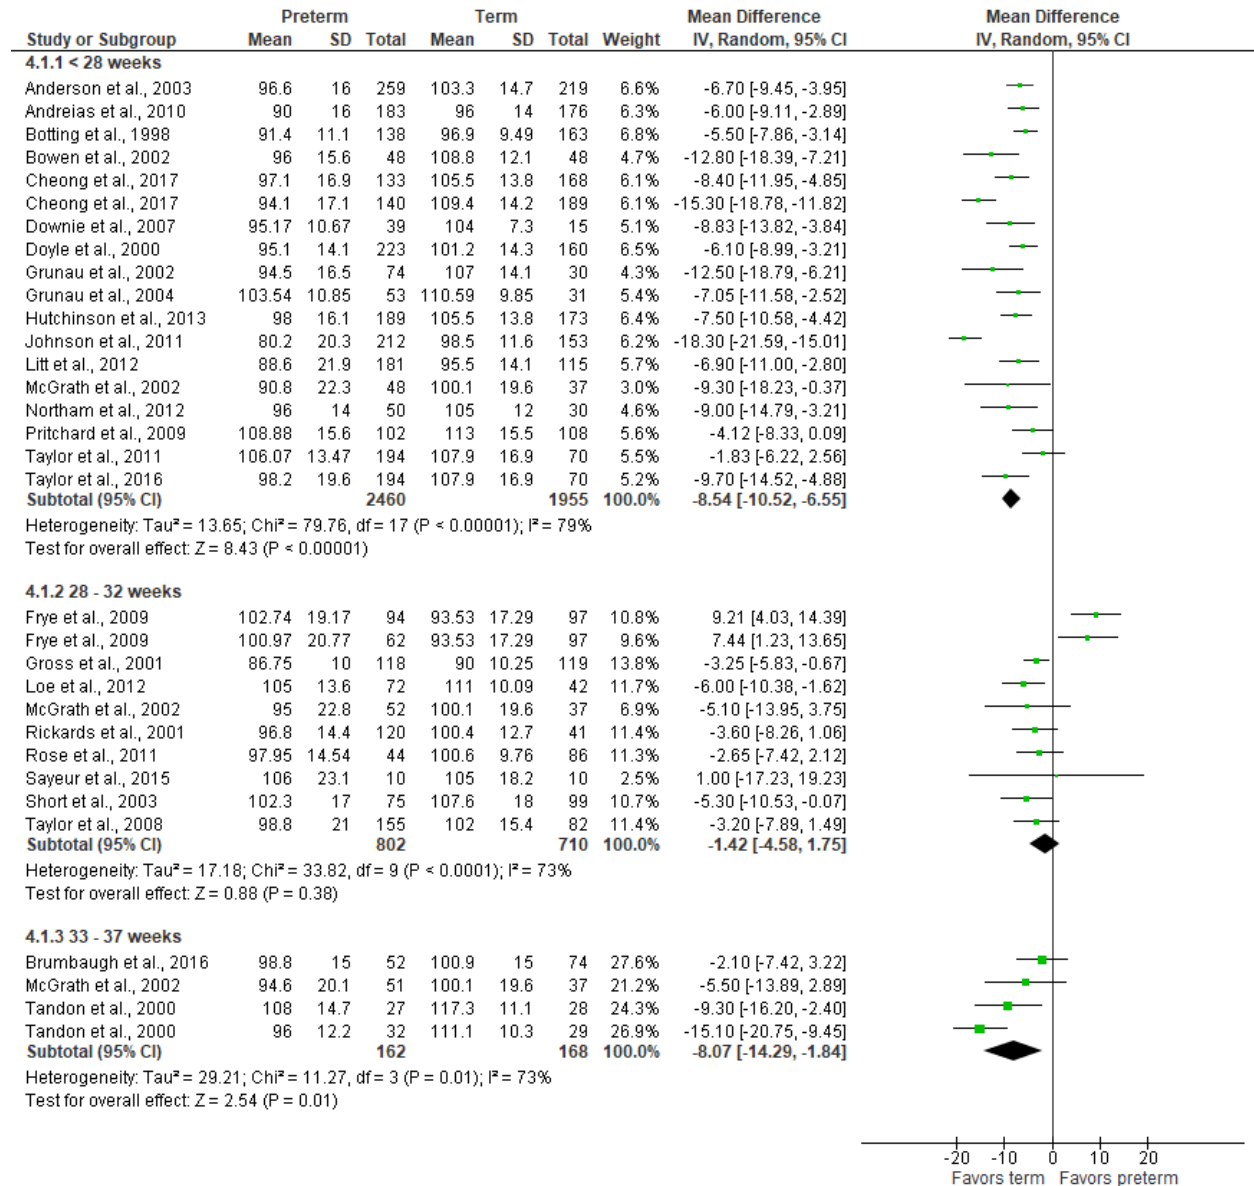

**eFigure 3.** Inverse-Variance Random-Effects Forest Plot of Gestational Age and Mathematics Outcomes for Preterm and Term-Born Children

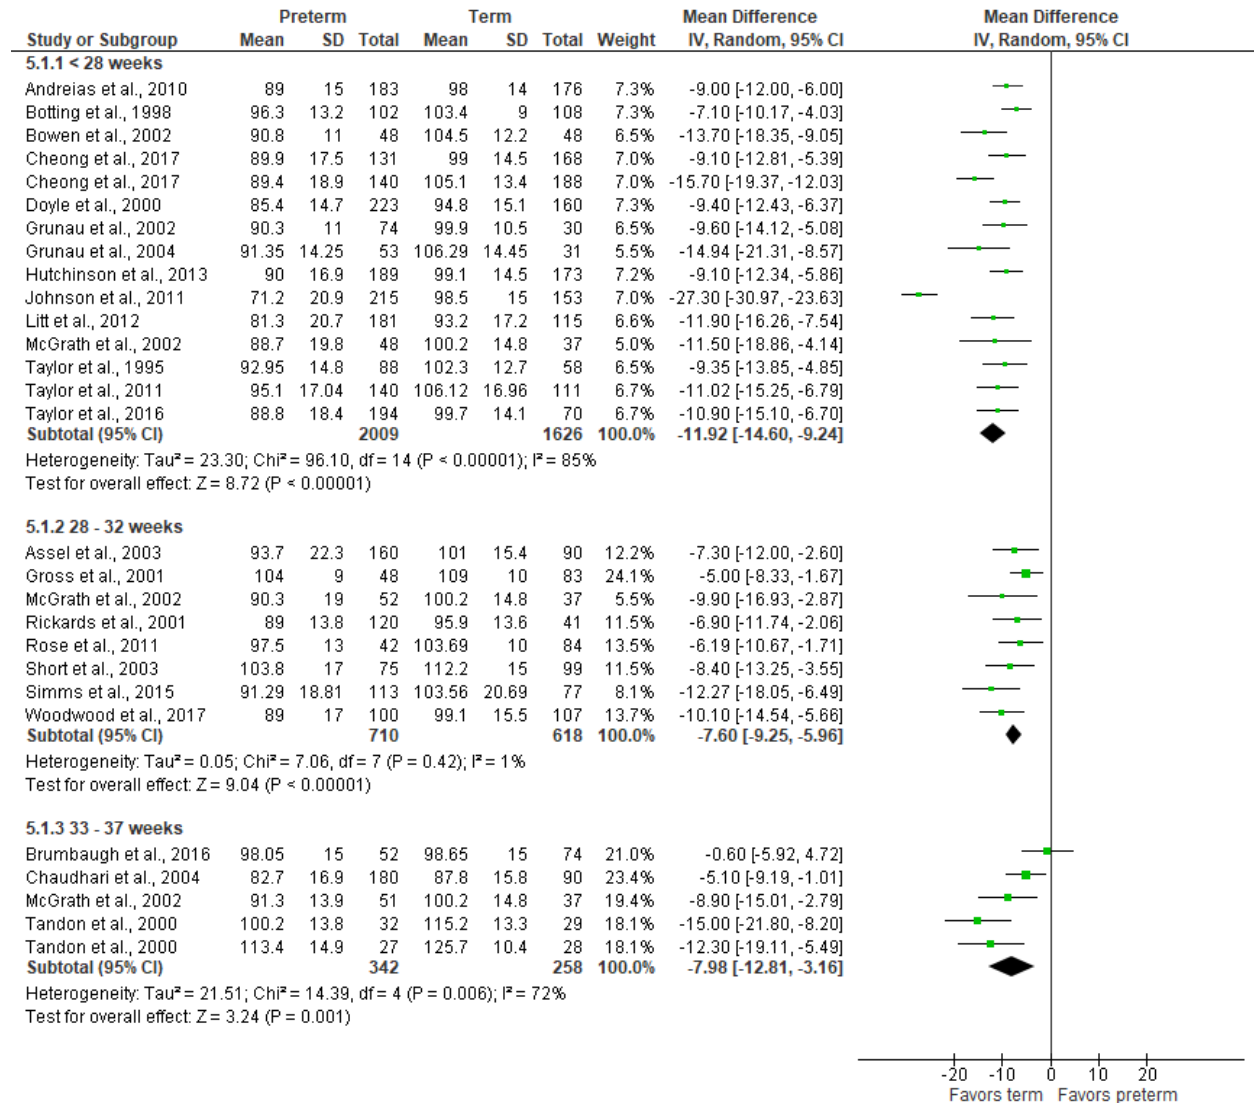

**eFigure 4.** Inverse-Variance Random-Effects Forest Plot of Assessment Age and Reading Outcomes for Preterm and Term-Born Children

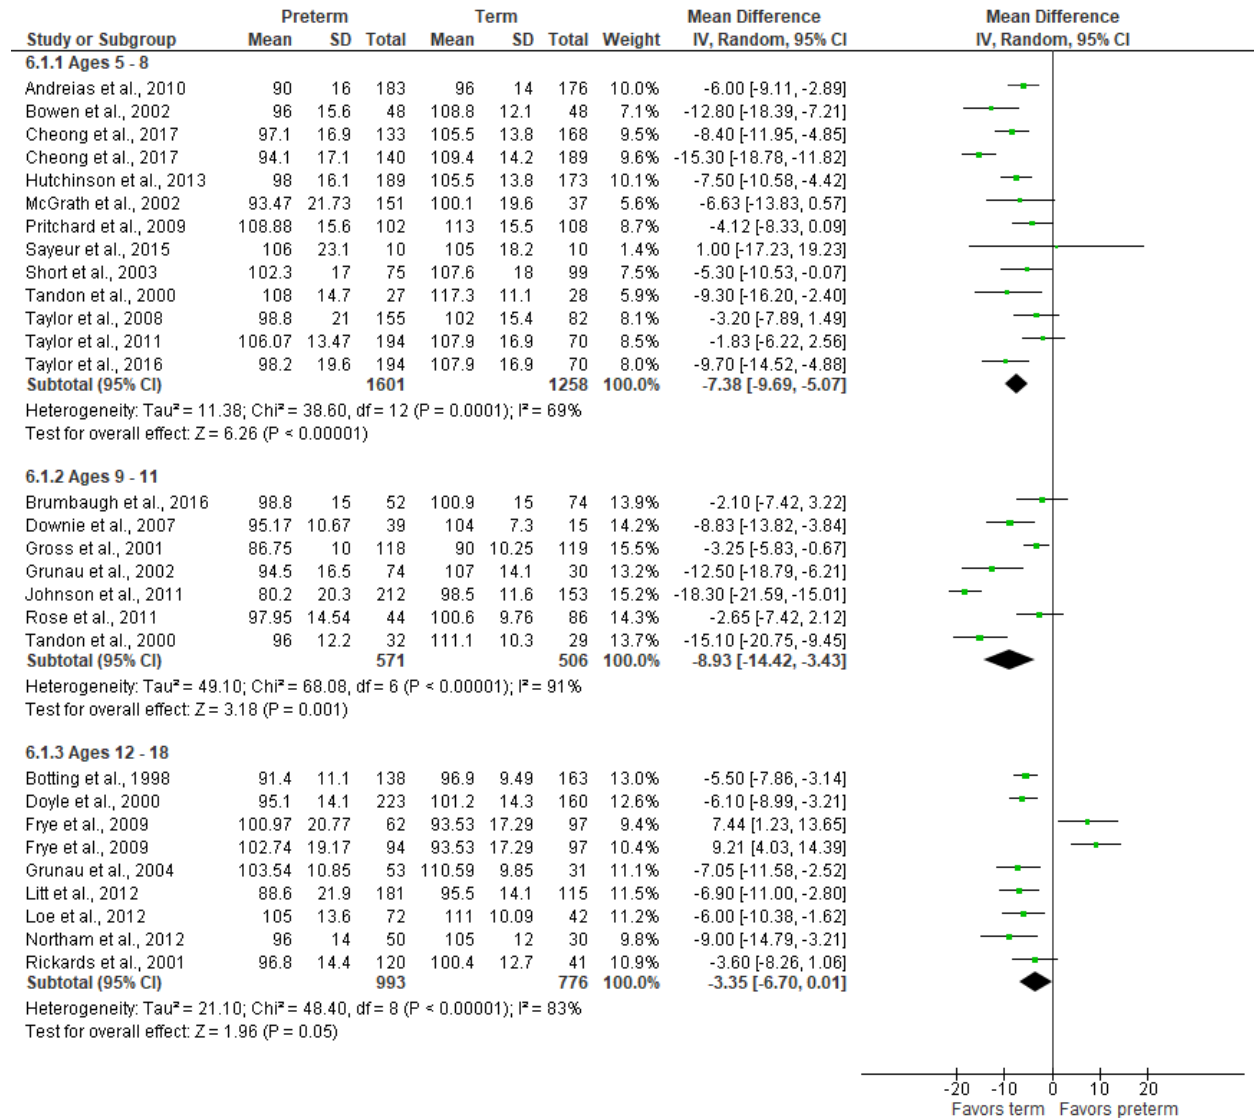

**eFigure 5.** Inverse-Variance Random-Effects Forest Plot of Assessment Age and Mathematics Outcomes for Preterm and Term-Born Children

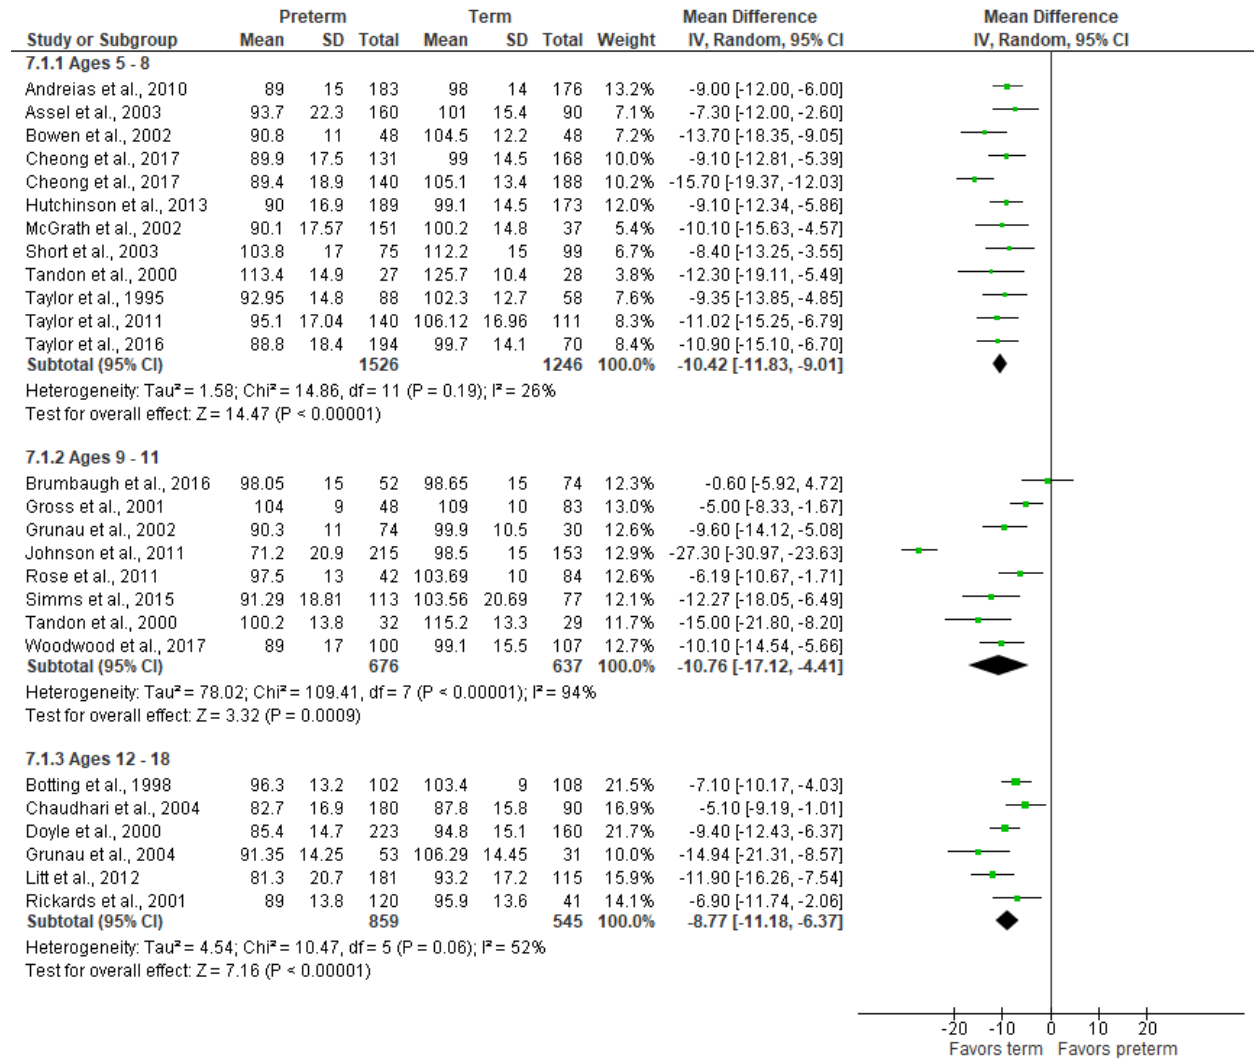

**eFigure 6.** Inverse-Variance Random-Effects Forest Plot of Birth Era and Reading Outcomes for Preterm and Term-Born Children

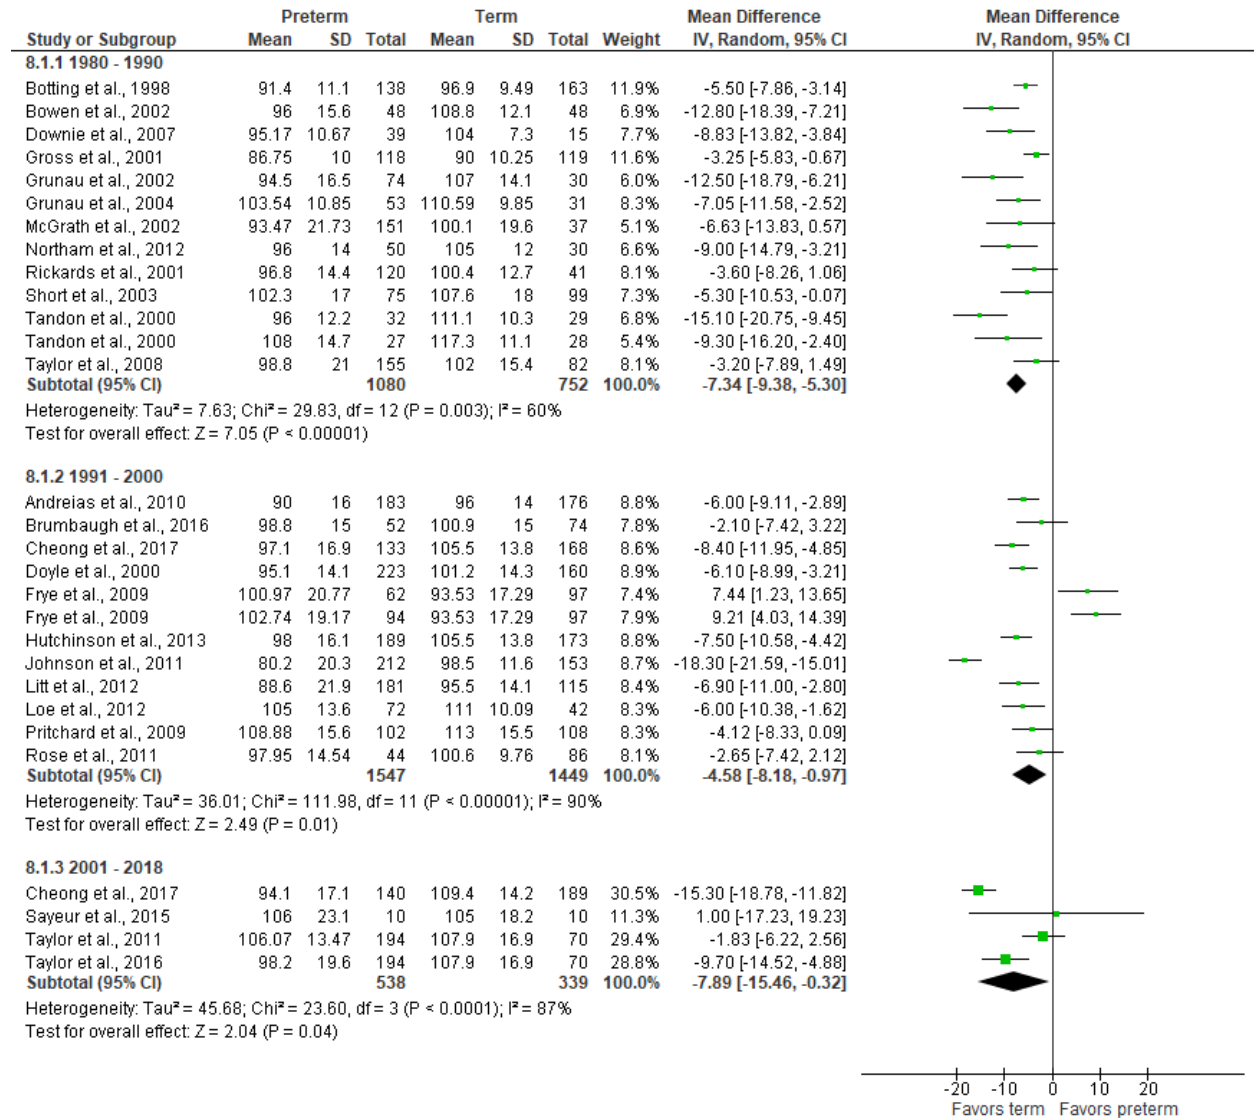

**eFigure 7.** Inverse-Variance Random-Effects Forest Plot of Birth Era and Mathematics Outcomes for Preterm and Term-Born Children

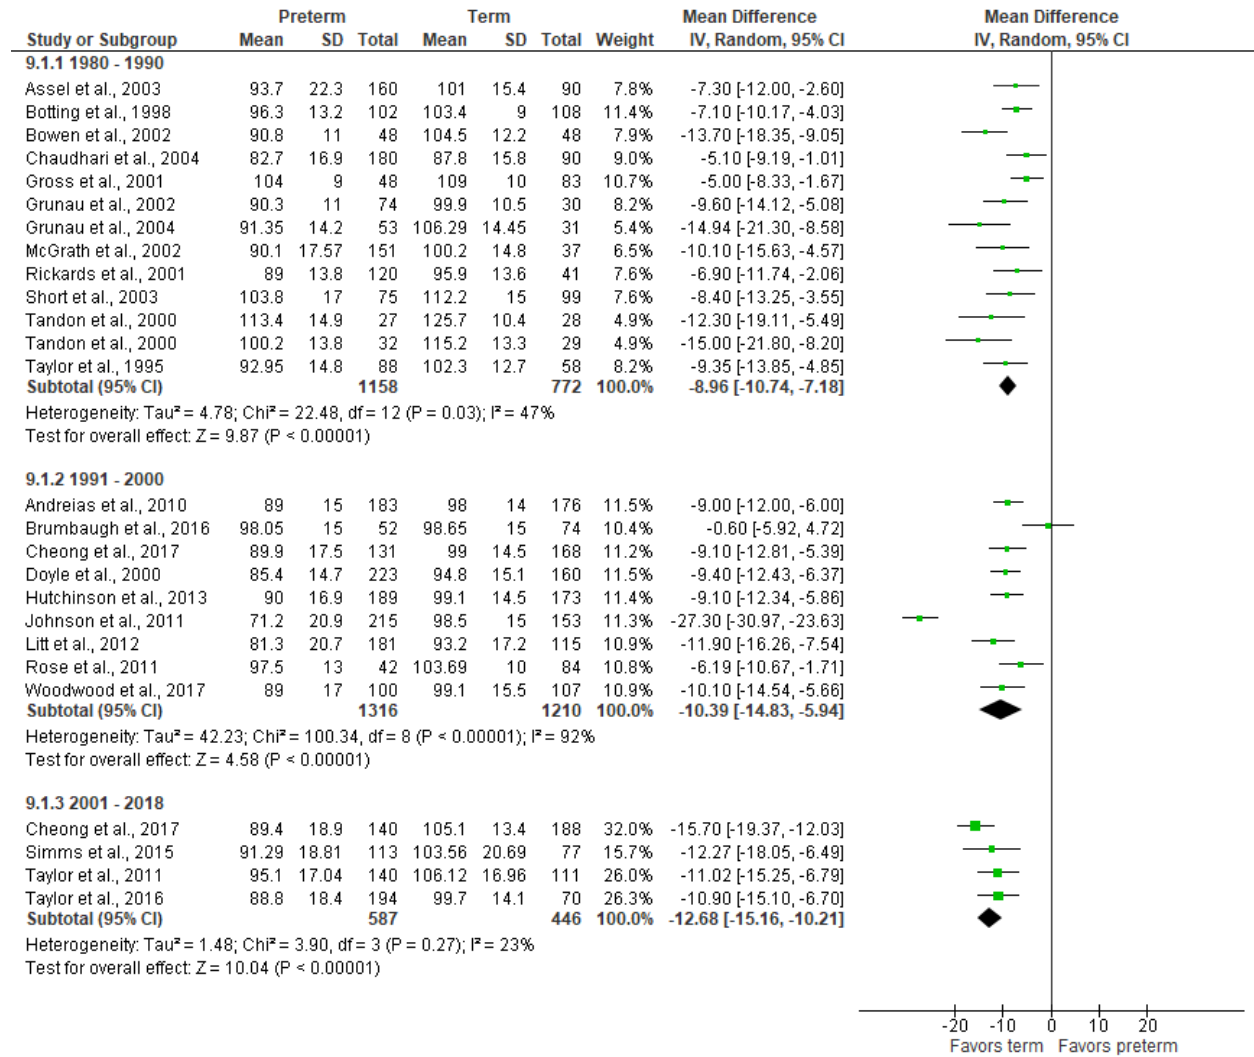

Supplement: jamanetwopen-3-e202027-s001.pdf [file jamanetwopen-3-e202027-s001.pdf]
